1 Endothelial exosome plays functional role during rickettsial infection

2 Yakun Liu<sup>a,†</sup>, Changcheng Zhou<sup>a,†</sup>, Zhengchen Su<sup>a,†</sup>, Qing Chang<sup>a</sup>, Yuan Qiu<sup>b</sup>, Jiani Bei<sup>a,c</sup>,  
3 Angelo Gaitas<sup>d</sup>, Jie Xiao<sup>a</sup>, Alexandra Drelich<sup>a</sup>, Kamil Khanipov<sup>e</sup>, Yang Jin<sup>f</sup>, Georgiy Golovko<sup>e</sup>,  
4 Tais B. Saito<sup>a,g,\*</sup>, Bin Gong<sup>a,\*</sup>

5 <sup>a</sup>Department of Pathology, University of Texas Medical Branch, Galveston, Texas 77555, USA

6 <sup>b</sup>Department of Mathematics and Statistics, Texas Tech University, Lubbock, Texas 79409, USA

7 <sup>c</sup>Currently in the Life Science Department, Tunghai University, Taichung City, Taiwan

8 <sup>d</sup>The Estelle and Daniel Maggin Department of Neurology, Icahn School of Medicine at Mount  
9 Sinai, 1468 Madison Ave, New York, New York 10029, USA

10 <sup>e</sup>Department of Pharmacology, University of Texas Medical Branch, Galveston, Texas 77555,  
11 USA

12 <sup>f</sup>Division of Pulmonary and Critical Care Medicine, Department of Medicine, Boston University  
13 Medical Campus, Boston, Massachusetts, USA

14 <sup>g</sup>Currently at the Laboratory of Bacteriology, Rocky Mountain Laboratories, Division of  
15 Intramural Research, National Institute of Allergy and Infectious Diseases, National Institutes of  
16 Health, Hamilton, Montana 59840, USA

17 <sup>†</sup> These authors contribute equally to this work.

1 \* **Correspondence to:** Bin Gong, MD, PhD, Tel. 409-266-6682; Email: [bigong@utmb.edu](mailto:bigong@utmb.edu), or  
2 Tais B Saito, DVM, PhD, Tel. 406-802-6374; Email: [tais.berellisaito@nih.gov](mailto:tais.berellisaito@nih.gov).

3 **Keywords:** Exosome, Extracellular vesicle, endothelial cell, endothelial barrier function, spotted  
4 fever group rickettsial infection.

## 5 **Abstract**

6 Spotted fever group rickettsioses (SFRs) are devastating human infections. Vascular  
7 endothelial cells (ECs) are the primary targets of infection. Edema resulting from EC barrier  
8 dysfunction occurs in the brain and lungs in most cases of lethal SFR, but the underlying  
9 mechanisms remain unclear. The aim of the study is to explore the potential role of *Rickettsia*  
10 (*R*)-infected, EC-derived exosomes (Exos) during infection. Using size-exclusion  
11 chromatography (SEC), we purified Exos from conditioned, filtered, bacteria-free media  
12 collected from *R*-infected human umbilical vein ECs (HUVECs) (*R*-ECEXos) and plasma of *R*-  
13 infected mice (*R*-plsExos). We observed that rickettsial infection increases the release of  
14 heterogeneous plsExos, but endothelial exosomal size, morphology, and production were not  
15 significantly altered following infection. Compared to normal plsExos and ECEXos, both *R*-  
16 plsExos and *R*-ECEXos induced dysfunction of recipient normal brain microvascular ECs  
17 (BMECs). The effect of *R*-plsExos on mouse recipient BMEC barrier function is dose-dependent.  
18 The effect of *R*-ECEXos on human recipient BMEC barrier function is dependent on exosomal  
19 RNA cargo. Next-generation sequencing analysis and stem-loop quantitative reverse  
20 transcription PCR (RT-qPCR) validation revealed that *R* infection triggered the selective  
21 enrichment of endothelial exosomal mir-23a and mir-30b, which target the endothelial barrier.

1 To our knowledge, this is the first report on the functional role of extracellular vesicles following  
2 infection by obligately intracellular bacteria.

### 3 **Importance**

4 Spotted fever group rickettsioses are devastating human infections. Vascular endothelial cells  
5 are the primary targets of infection. Edema resulting from endothelial barrier dysfunction occurs  
6 in the brain and lungs in most cases of lethal rickettsioses, but the underlying mechanisms  
7 remain unclear. The aim of the study is to explore the potential role of *Rickettsia*-infected,  
8 endothelial cell-derived exosomes during infection. We observed that rickettsial infection  
9 increases the release of heterogeneous plasma Exos, but endothelial exosomal size, morphology,  
10 and production were not significantly altered following infection. *Rickettsia*-infected, endothelial  
11 cell-derived exosomes induced dysfunction of recipient normal brain microvascular endothelial  
12 cells. The effect is dependent on exosomal RNA cargo. Next-generation sequencing analysis  
13 revealed that rickettsial infection triggered the selective enrichment of endothelial exosomal mir-  
14 23a and mir-30b, which target the endothelial barrier. To our knowledge, this is the first report  
15 on the functional role of extracellular vesicles following infection by obligately intracellular  
16 bacteria.

### 17 **Introduction**

18 Spotted fever group rickettsioses (SFRs) are devastating human infections (1). A licensed  
19 vaccine is not available. It forecasted that increased ambient temperatures under conditions of  
20 global climate change will lead to more widespread distribution of rickettsioses (2). These  
21 arthropod-borne diseases are caused by obligately intracellular bacteria of the genus *Rickettsia*

1 (*R*), including *R. rickettsii* (3, 4) and *R. parkeri* (5-7) that cause Rocky Mountain spotted fever  
2 and *R. parkeri* rickettsiosis (8), respectively, in the United States and Latin America; *R. conorii*,  
3 the causative agent of Mediterranean spotted fever endemic to southern Europe, North Africa,  
4 and India (9); and *R. australis*, which causes Queensland tick typhus in Australia (10). Vascular  
5 endothelial cells (ECs) are the primary targets of infection, and EC tropism plays a central role  
6 during pathogenesis (1, 3, 11). Edema resulting from EC barrier dysfunction occurs in the brain  
7 and lungs in most cases of lethal SFR. Typically, *R* infection is controlled by appropriate broad-  
8 spectrum antibiotic therapy if diagnosed early (3, 4). However, *R* infections can cause  
9 nonspecific signs and symptoms, rendering early clinical diagnosis difficult (12, 13). Untreated  
10 or misdiagnosed *R* infections are frequently associated with severe morbidity and mortality (1,  
11 14-17). A fatality rate as high as 32% has been reported in hospitalized patients with  
12 Mediterranean spotted fever (17). Although doxycycline is the antibiotic of choice for *R*  
13 infections, it only stops bacteria from reproducing, but does not kill the rickettsiae.  
14 Comprehensive understanding of rickettsial pathogenesis is urgently needed for the development  
15 of novel therapeutics (7, 16, 18-22).

16 Eukaryotic cell-to-cell communication is critical for maintaining homeostasis and responding  
17 quickly to environmental stimuli (23-51). Besides direct intercellular contact, this  
18 communication is often mediated by soluble factors that can convey signals to a large repertoire  
19 of responding cells, either locally or remotely. Extracellular vesicles (EVs) transfer functional  
20 mediators to neighboring and distant recipient cells (33). EVs are broadly classified into two  
21 categories, exosomes (Exos)(50-150 nm) and microvesicles (100-1000 nm), owing to their  
22 endocytic or plasma membrane origin (38, 52-66). Exos and microvesicles are also termed as  
23 small and large EVs, respectively (55). Exo biogenesis begins with the formation of intraluminal

1 vesicles, the intracellular precursors of Exos, after the inward budding of the membranes of late  
2 endosomes (37, 54). Intraluminal vesicles are internalized into a multivesicular body, which  
3 transits towards and fuses with the plasma membrane, before releasing intraluminal vesicle into  
4 the extracellular environment as Exos (53). An Exo contains many types of biomolecules,  
5 including proteins, nucleic acids, and lipids (67). Once bound to the plasma membrane of the  
6 recipient cell, Exos can induce functional responses by multiple mechanisms, e.g., activating  
7 receptors on recipient cells or releasing their bioactive cargos after internalization (67, 68). In  
8 infectious biology, EVs from infected donor cells contain cargos that are associated with the  
9 virulence of the pathogen or the activation of host self-defense mechanisms (33-38, 69-71). EVs  
10 released from macrophages infected by intracellular bacteria, such as *Mycobacterium*  
11 *tuberculosis* and *Salmonella typhimurium*, have been shown to stimulate a pro-inflammatory  
12 response in non-infected macrophages in toll-like receptor-dependent manner (70).  
13 Unfortunately, the role(s) of EVs in the pathogenesis of obligately intracellular bacterial  
14 infections remains unknown.

15 Although small noncoding RNA (sncRNA) species (<150 nucleotides) are relatively stable  
16 when compared with other RNA molecules, they remain vulnerable to ribonuclease (RNase)-  
17 mediated digestion (72). The discovery of extracellular sncRNAs in the blood, despite the  
18 abundant presence of RNases, led to the proposal of a scenario in which sncRNAs are  
19 encapsulated in EVs (55, 72-74) or form circulating ribonucleoproteins (75, 76). Extracellular  
20 RNAs are enriched in sncRNAs (77). A growing number of reports have established that many,  
21 if not all, the effects of EVs are mediated by microRNA (52, 55-60, 63) or tRNA fragment (61,  
22 78) cargos, which remain functional to regulate cellular behaviors of the recipient cells (79).  
23 Recent studies provide emerging evidence that microRNAs are selectively sorted into EVs

1 independently of their cellular levels (52, 55-62). We reported that *R* infection induces  
2 significant upregulation of specific tRNA-derived RNA fragments in host cell, but no global  
3 changes of microRNAs in perfusion-rinsed mouse lung tissues was observed (80). Information  
4 regarding the potential role of extracellular RNAs during *R* infection is still lacking.

5 The aim of this study is to explore the potential role of *R*-infected, EC-derived Exos  
6 following infection. Using size-exclusion chromatography (SEC), we purified Exos from  
7 conditioned, filtered, bacteria-free media collected from *R*-infected human umbilical vein ECs  
8 (HUVECs) (*R*-ECEXos) and plasma of *R*-infected mice (*R*-plsExos). We observed that,  
9 compared to noninfectious normal mouse plsExos and normal HUVEC-derived Exos, both *R*-  
10 plsExos and *R*-ECEXos induced dysfunction of normal brain microvascular ECs (BMECs). The  
11 effect of *R*-plsExos on mouse recipient BMEC barrier function is dose-dependent. The effect of  
12 *R*-ECEXos on human recipient BMEC barrier function is dependent upon exosomal RNA cargos.  
13 Saponin-assisted active exosomal permeabilization pretreatment (81-83) of *R*-ECEXos with  
14 RNase mitigated the effect of *R*-ECEXos on recipient BMEC barrier function. Next-generation  
15 sequencing analysis and stem-loop quantitative reverse transcription PCR (RT-qPCR) validation  
16 revealed that *R* infection triggered the selective enrichment of endothelial exosomal mir-23a and  
17 mir-30b, which target the endothelial barrier.

1 **Results**

2 **1. Quality assessment of bacteria-free Exos from the plasma of *R. australis*-infected**  
3 **mice (*R*-plsExos) and the media of *R. parkeri*-infected HUVECs (*R*-ECEXos)**

4 Using SEC, we isolated small EVs (50-150 nm) from *R*-infected mouse plasma and HUVECs  
5 from culture media; both were passed through two 0.2  $\mu$ m filters. Quantitative real-time PCR  
6 validated that no rickettsial DNA copies were detected in either *R*-plsExos isolated *R. australis*-  
7 infected mice infected with 2 LD<sub>50</sub> of bacteria (80, 84-87) on day 4 post-infection (p.i.), or the *R*-  
8 ECEXos that were purified 72 hrs p.i. from *R. parkeri*-infected HUVECs (6) using a multiplicity  
9 of infection (MOI) of 10 (**Fig. Suppl 1**).

10 Sizes and morphologies of isolated EVs from mouse plasma and EC culture media,  
11 respectively, were initially evaluated using transmission electron microscopy (TEM) (52, 88), or  
12 atomic force microscopy (AFM) (89). The images captured using TEM and AFM show particles  
13 with typical exosomal morphology (arrowheads in **Fig. 1a**), as published previously (52, 88, 90).  
14 Using nanoparticle tracking analysis (NTA), the size distribution of isolated EVs was also  
15 confirmed to be in the range of 50 to 150 nm, which is the expected size of Exos (**Figs. 1b and**  
16 **c**). We also verified the purity of isolated Exos using western immunoblotting to detect  
17 traditional exosomal markers as shown in **Fig. 1d** (64, 73, 90).

18 These data demonstrate that purified EVs from *R*-infected mouse plasma or culture media  
19 used in these studies was free of bacteria or bacterial DNA, were intact and did not aggregate,  
20 and fell within the expected size the range of Exos.

1        **2. Exos are differentially induced and detected in mouse plasma and EC culture media**  
2                    **in response to *R* infection**

3        Serum Exos have been identified as being heterogeneous and derived from multiple cell  
4 types, including ECs. Using western immunoblotting, we detected EC markers [CD31 and VE-  
5 cadherin (91, 92)] in mouse plsExos, as well as markers of other cells (CD45) (**Fig. 2a**),  
6 suggesting that the mouse plsExos used in these studies was derived from different types of cells,  
7 including ECs.

8        Exosomal particle counts were measured using NTA, and showed that similar numbers of  
9 endothelial Exos are produced by mock and *R* infection groups *in vitro* (**Fig. 2b**). However, the  
10 number of mouse *R*-plsExos was upregulated on day 4 p.i. ( $p=0.02$ ) *in vivo* (**Fig. 2c**). Exos were  
11 also assessed using exosomal total protein content (88). As shown in **Figs. 2d and 2e**, the  
12 generation of *R*-plsExos was significantly upregulated on day 4 p.i. ( $p=0.005$ ). Furthermore, we  
13 also compared the morphology of EC-derived Exos using TEM and AFM, and demonstrated no  
14 significant differences between normal ECExos and *R*-ECExos (**Fig. 1a**).

15        Collectively, these data suggest that *R* infection increases heterogeneous plsExo release.  
16 However, endothelial Exo size, morphology, and production were not significantly altered after  
17 infection *in vitro*.

18        **3. Recipient cells efficiently take up Exos**

19        ECs are directly exposed to circulating substances and Exos, which are abundant in blood  
20 and are taken up by ECs (93, 94). To confirm that ECs take up Exos *in vivo*, we intravenously  
21 delivered fluorescent PKH26-labeled plsExos ( $1 \times 10^{11}$  particles per mouse in 100  $\mu$ l PBS) to



1 normal mice as described (90). As in **Fig 3a**, co-localization between PKH26 (red) and CD31  
2 (green, a marker of EC lineage) (arrowheads) were identified in multiple organs in mice, which  
3 were extensively perfused with PBS at 6 hrs post-injection, prior to fixation. These data suggest  
4 that plsExos directly interact with ECs *in vivo*.

5 Next, we examined HUVEC-derived ECExo uptake using normal recipient cells (i.e., human  
6 BMECs) *in vitro*. PKH26-labeled ECEXos and non-labeled controls were added to the cultured  
7 human BMECs. As early as 2 hrs after incubation, the uptake of PKH26-labeled ECEXos by  
8 BMECs was visualized using fluorescence microscopy (**Fig. 3b**).

9 These data suggest that vascular ECs efficiently take up Exos in our models.

#### 10 **4. Effect of mouse *R*-plsExos on normal mouse recipient ECs**

11 We next sought to evaluate the potential effect of *R*-plsExo on normal recipient ECs during *R*  
12 infection. Using SEC, *R*-plsExos from a mouse that was intravenously infected with a 2 LD<sub>50</sub>  
13 dose of *R. australis* (86, 87) were isolated. Normal mouse recipient BMECs were treated with  
14 normal plsExos or *R*-plsExos at different doses (i.e., 8, 40, or 160 pg Exos/per cell) for 72 hrs  
15 before measuring the transendothelial electrical resistance (TEER), an indicator for endothelial  
16 paracellular barrier function (95). We found that, compared to normal mouse plsExos, mouse *R*-  
17 plsExos derived on day 4 p.i. reduced the TEER in normal recipient ECs in a dose-dependent  
18 manner (**Fig. 4a**).

19 This evidence suggests that mouse *R*-plsExos induce dysfunction in normal recipient ECs in  
20 a dose-dependent manner.

1        **5. Human *R*-ECEXos induced dysfunction of normal human recipient ECs in an**  
2                    **exosomal RNA-dependent manner**

3        Endothelial markers were detected in plsExos (**Fig. 2a**). Given that ECs are the major target  
4 cells during *R* infection, HUVEC-derived ECEXos were used to explore their effect on normal  
5 human recipient BMEC function.

6        It was first found that, compared with normal (mock) ECEXos (40 pg vesicle particles), *R*-  
7 ECEXos (40 pg vesicle particles) reduced TEER in normal recipient BMECs (**Fig. 4b**).  
8 Furthermore, *R*-ECEXos (40 pg particles/cell) weakened the tight junctional protein ZO-1  
9 (arrowheads in **Fig. 4c**) of normal recipient BMECs. However, we did not observe remarkable  
10 alteration of adherens junctional protein VE-cadherin (**Fig. 4c**).

11        Exos contain many types of biomolecules, including proteins and nucleic acids, which  
12 contribute to disease pathogenesis (68). Active encapsulation techniques have been widely  
13 employed in the field of EV research, showing no significant impairment of exosomal  
14 constitution, integrity, and functionality (81-83). To identify the functional exosomal cargos  
15 during *R* infection, we employed saponin-assisted active permeabilization (81-83) to pretreat  
16 exosomal cargos with 20 µg/mL RNase in the presence of 0.1 mg/ml saponin. Such pretreatment  
17 of *R*-ECEXos mitigated the effect on TEER in normal recipient BMECs, compared to RNase in  
18 the absence of permeabilization or heat-treated RNase in the presence of saponin (**Fig. 4b**).  
19 Similar pretreatment of *R*-ECEXos with RNase in the presence of saponin also impaired the tight  
20 junctional protein ZO-1 in recipient BMECs (**Fig. 4c**).

1        These data suggest that *R*-ECEXos can induce normal recipient EC barrier dysfunction in an  
2        exosomal RNA cargo-dependent manner.

### 3        **6. *R* infection upregulates exosomal mir-23a and mir-30b**

4        EV RNA cargo mostly consists of sncRNAs, mainly microRNAs and tRNA-derived  
5        fragments (61, 77, 78). A growing number of reports have established that many effects of EVs  
6        are mediated by microRNAs (52, 55-60, 63). We characterized the exosomal microRNA cargo  
7        using next-generation sequencing (**Fig. 5a**). RNAs were isolated from Exos released from  
8        HUVECs infected with *R. parkeri* (at 10 MOI) for 72 hrs or mock-infected. *R. parkeri* is a BSL-  
9        2 pathogen, facilitating us to do mechanism studies. There were no differences in total sncRNAs  
10       (<150 nucleotides) obtained per Exo between normal ECExo and *R*-ECExo. Seventy-two hours  
11       after *R* infection, mir-23a and mir-30b exhibited the greatest induction of expression in *R*-  
12       ECEXos, reaching 7.69-fold and 3.04-fold increases compared to controls, respectively (**Fig. 5b**).

13       We next validated the enhanced expression of mir-23a and mir-30b in Exos using stem-loop  
14       RT-qPCR, which is a common method for detecting sncRNAs in EVs (52, 61, 96, 97). In **Fig. 5c**,  
15       exosomal mir-23a was up-regulated after *R* infection with a 3-fold increase in expression  
16       compared to the mock group ( $P < 0.01$ ). Similarly, mir-30b had a near 3-fold increase ( $P < 0.05$ ).  
17       However, the levels of mir-127 (98), mir-451, and mir-92a were stable between mock ECEXos  
18       and *R*-ECEXos (**Fig. 5c**). Furthermore, we did not detect different levels of these miRNAs in cell  
19       samples between groups (**Fig. 5d**).

20       Collectively, our data suggest that miR30b and miR23a are selectively sorted into *R*-ECEXos  
21       following *R* infection.

1

## Discussion

2 ECs are the primary mammalian host target cells of SFR infection (2,5,6). The most  
3 prominent pathophysiological effect during SFR infections is increased microvascular  
4 permeability, followed by vasogenic cerebral edema and non-cardiogenic pulmonary edema with  
5 potentially fatal outcomes (2,5). Cellular and molecular mechanisms underlying endothelial  
6 barrier dysfunction in rickettsiosis remains largely unknown (7-9). The novel findings in the  
7 present study are that *R* infection increases heterogeneous plsExos release, but endothelial Exo  
8 size, morphology, and production are not significantly altered following infection. Mouse *R*-  
9 plsExos induced dysfunction of normal mouse recipient BMECs in a dose-dependent manner,  
10 and human *R*-ECEXos induced dysfunction of normal human recipient BMECs in an exosomal  
11 RNA cargo-dependent manner. Next-generation sequencing and stem loop RT-qPCR analyses  
12 suggest that mir-23a and mir-30b are selectively sorted into *R*-ECEXos after *R* infection. To our  
13 knowledge, this is the first report of studying EVs in the context of obligately intracellular  
14 bacterial infections.

15 Exos are in a similar size range as viruses (33, 94) and contain many types of biomolecules,  
16 including proteins and nucleic acids that contribute to diseases pathogenesis, and are being  
17 actively investigated in cancers, as biomarkers, and as potential therapeutics (33-38, 68, 70).  
18 Exos have been studied in the context of different infections (33-38, 70, 71). During infection,  
19 EVs released from the host can be derived from the pathogen or the host. It has been reported  
20 that pathogens can utilize different mechanisms to hijack host Exos to maintain their survival and  
21 increase their pathogenicity (33). *Mycobacterium tuberculosis* releases lipoarabinomannan into  
22 Exos to decrease the interferon response of the recipient macrophage (33). Exosomal gp63 from

1 leishmania has been shown to downregulate the proinflammatory genes in dendritic cells and  
2 macrophages (99). Exos released from *Leishmania donovani*-infected macrophages block the  
3 formation of microRNA-122 in recipient hepatocytes, resulting in a higher pathogen burden  
4 (100). However, most enveloped virions are the same size as Exos, and major exosomal surface  
5 markers CD63 and CD81 are enriched in enveloped viruses (54). Such similarities make the  
6 separation of virions and Exos in infected samples particularly challenging (54). *Rickettsia* are  
7 strictly intracellular bacteria whose size is about 2.0  $\mu\text{m}$  in length (22, 101, 102). Taking  
8 advantage of the SEC technology, we succeeded in isolating and purifying bacteria-free plsExos  
9 and ECEXos from *R*-infected mouse plasma and cell culture media, respectively, having laid the  
10 technical foundation for studying the potential role of Exos in the pathogenesis of rickettsiosis.

11 Differential centrifugation has been employed for Exo isolation for many years, but the  
12 technique suffers from aggregation and decreased integrity of Exos (38, 53, 64-66). Recently,  
13 single-step SEC was employed successfully for Exo purification with improved integrity, yield,  
14 and no aggregation (38, 53, 64-66). In the present study, using SEC technology, we have  
15 successfully isolated Exos from plasma and culture media in BSL-2/3 facilities and validated  
16 Exo quality using multiple EV-specific assays (**Fig. 1**), demonstrating size-purity and  
17 morphologic integrity without aggregation. Exo size and morphology were not significantly  
18 changed after *R* infection (**Fig. 1**). The generation of plsExos was significantly upregulated after  
19 *R* infection, while no difference was detected in plasma protein concentrations. However, our *in*  
20 *vitro* endothelial *R* infection model demonstrated no significant difference in exosomal  
21 generation between normal and *R*-infected ECs. Circulating Exos have been identified as  
22 heterogeneous and derived from multiple different types of cells, including ECs, epithelial cells,

1 leukocytes, erythrocytes, and platelets (90). Our data suggest that endothelial Exo size,  
2 morphology, and production were not significantly altered after infection.

3 Exos can induce functional responses by multiple mechanisms, including releasing bioactive  
4 components after internalization (67, 68). In infectious disease biology, EVs from infected donor  
5 cells are associated with virulence of the pathogens in recipient cells (33-38, 69-71). In the  
6 present study, both *R-plsExos* and *R-ECEXos* weakened the barrier function of the normal mouse  
7 ECs. Concomitantly, human *R-ECEXos* induced disruption of the tight junctional protein ZO-1 in  
8 recipient human BMECs in an exosomal RNA-dependent manner. However, the underlying  
9 mechanism remains unclear.

10 The discovery of extracellular sncRNAs in the blood, despite the abundant presence of  
11 RNases, led to the proposal of a scenario in which sncRNAs are encapsulated in EVs (55, 72-74)  
12 or in the form of circulating ribonucleoproteins (75, 76). EV-enclosed messenger RNAs are  
13 mostly fragmented, and extracellular RNAs are enriched in sncRNAs (77). Despite a previous  
14 report that the average copy number of miRNAs in each EV is low (103), accumulating evidence  
15 suggests a critical function of EV-containing miRNAs. EV RNA cargo mostly consists of  
16 sncRNAs (77). A growing number of reports have established that many, if not all, the effects of  
17 EVs are mediated by microRNAs (52, 55-60, 63), which remain functional to regulate cellular  
18 behaviors of the recipient cell (79). Exosomal microRNAs are of particular interest due to their  
19 participation in posttranslational regulation of gene expression. A single microRNA can regulate  
20 many target genes to affect biological function (104). Recent studies provide emerging evidence  
21 that microRNAs are selectively sorted into EVs, independent of their cellular levels (52, 55-62).  
22 We observed no significant differences in total sncRNAs (<150 nucleotides) per Exo between

1 normal ECExo and *R*-ECExo. Seventy-two hours after *R* infection, expression levels of mir-23a  
2 and mir-30b were remarkably upregulated in *R*-ECEXos, but no change was observed in the  
3 mock-infected cells. These data suggest that miR30b and miR23a are selectively sorted into *R*-  
4 ECEXos during *R* infection. The underlying mechanism is yet to be elucidated.

5 Analysis of the interactions among enriched exosomal microRNAs and potential mRNA  
6 targets will provide putative mRNA candidates for future studies. Given that the molecular and  
7 functional effects of mir-23a (105-108) and mir-30b (108, 109) have been documented to target  
8 endothelial barrier functions, further research into the selective sorting mechanism(s) and  
9 functional roles of exosomal mir-23a and mir-30b may provide new insights into the  
10 pathogenesis of SFR. Furthermore, additional research may validate specific exosomal  
11 microRNAs as impactful druggable targets for the prevention and treatment of fatal human  
12 diseases caused by *Rickettsia* and other pathogens.

13

14

## Materials and Methods

### 15 Mouse model of *R. australis* infection

16 All animal experiments were performed according to protocols approved by the Institutional  
17 Animal Care and Use Committee of the University of Texas Medical Branch (UTMB). Wild-  
18 type (WT) mice (C57BL/6J) were obtained from Jackson Laboratory (Bar Harbor, ME). All  
19 mice used in this study were 8 to 12 week-old males. C57BL/6J mice are highly susceptible to *R*.  
20 *australis*. Therefore, this organism was chosen as the SFG rickettsial agent of choice (10). The  
21 male C57BL/6 mouse-*R. australis* model is an established animal model of human SFG

1 rickettsiosis because the pathology involves disseminated endothelial infection and pathological  
2 lesions, including vasculitis in multiple organs, similar to what is observed in human SFG  
3 rickettsiosis (10, 87). After an ordinarily lethal dose of 2 LD<sub>50</sub> *R. australis* (the LD<sub>50</sub> is 1 x 10<sup>6</sup>  
4 PFU) was injected through the tail vein (87), blood samples were collect on day 4 p.i. for plasma  
5 samples.

## 6 **Nanoparticle tracking analysis (NTA)**

7 NTA was performed to determine the size and concentration of EVs at Nanomedicines  
8 Characterization Core Facility (The University of North Carolina at Chapel Hill, Chapel Hill,  
9 NC). Briefly, isolated Exo samples were diluted to a concentration of 5x10<sup>9</sup> to 1x10<sup>11</sup>  
10 particles/ml in filtered PBS. The samples were then run on a NanoSight NS500 (NanoSight,  
11 Malvern Instruments, Westborough, MA) to capture particles moving by way of Brownian  
12 motion (camera type, sCMOS; camera level, 16; detection threshold, 5). The hydrodynamic  
13 diameters were calculated using the Stokes-Einstein equation. The 100-nm standard particles and  
14 the diluent PBS alone were used for reference.

## 15 **microRNA quantification in HUVEC Exos**

16 As previously reported (52), RNAs were extracted from purified HUVEC Exos. Small RNAs  
17 (6–150 nucleotides) and microRNA fractions (10–40 nucleotides) were quantified using high-  
18 resolution small RNA analysis (Agilent 2100 Bioanalyzer system, Santa Clara, CA) at the  
19 Biopolymer Facility (Harvard Medical School, Cambridge, MA). To determine the concentration  
20 of small RNAs and microRNAs per Exo, the quantified sncRNA/microRNA value was  
21 normalized to the Exo count, which was evaluated using NTA.



## 1 **Bioinformatic analysis of sequencing data**

2 Sequencing was done using an Illumina NextSeq as single-end 75 base pair reads  
3 generating between 4.8 and 40.9 million reads per sample. Quality control of the samples was  
4 performed using QIAGEN CLC Genomics Workbench 20.0. Raw sequencing reads were  
5 trimmed to remove QIAGEN 3'-AACTGTAGGCACCATCAAT and 5'-  
6 GTTCAGAGTTCTACAGTCCGACGATC adapters, as well as filtered based on initial quality  
7 assessment. Reads dominated by low-quality base calls, and longer than 55 nucleotides, were  
8 excluded from the downstream analyses. Filtered data undergo further RNA-seq analysis using  
9 the CLC Genomics Workbench 20.0 RNA-Seq Analysis 2.2 module with RNAcentral noncoding  
10 Human RNA (110, 111)(downloaded April 16, 2020), miRbase 22.1, and the ENSEMBL GRCh38  
11 noncoding RNA gene collection (112)(downloaded November 20, 2019). Differential expression  
12 analysis was performed using the “Differential Expression in Two Groups 1.1” module. The  
13 differential expression module uses multi-factorial statistics based on a negative binomial  
14 generalized linear model (GLM) to correct for differences in library size between the samples  
15 and the effects of confounding factors. The Wald test was used to compare the expression of  
16 noncoding RNA between the groups.

## 17 **Atomic force microscopy (AFM)**

18 The purified and concentrated EV sample was diluted at 1:10, 1:100, and 1:1000 with  
19 molecular grade water. Glass coverslip were cleaned three times with ethanol and acetone, then  
20 three times with molecular grade water. The coverslip was correctly labeled and placed in the  
21 hood to dry under laminar flow for an hr and subjected to coating with the diluted EV samples on

1 the designated area for 30 minutes. EV samples were washed away gently with molecular grade  
2 water, and the coverslip was dried for one hr.

3 The coverslip coated with EV samples was examined using an AFM (CoreAFM, Nanosurf  
4 AG, Liestal, Switzerland) using contact mode in the air. A PPP-FMR-50 probe (0.5-9.5N/m,  
5 225 $\mu$ m in length and 28 $\mu$ m in width, Nanosensors) was used. The parameters of the cantilever  
6 were calibrated using the default script from the CoreAFM program using the Sader *et al.*  
7 method. (113) The cantilever was approached to the sample under the setpoint of 20 (113)nN,  
8 and topography scanning was done using the following parameters: 256 points per line, 1.5  
9 seconds per line in a 5- $\mu$ m x 5- $\mu$ m image.

#### 10 **Rickettsiae, cell culture, and *R. parkeri* infection**

11 *R. australis* (Cutlack strain) (87) and *R. australis* (Atlantic rainforest strain)(114) were  
12 prepared as described. Uninfected Vero cells were processed as mock control material using the  
13 same procedure. All biosafety level (BSL)-3 or ABSL-3 experiments were performed in CDC-  
14 certified facilities in the Galveston National Laboratory at UTMB, Galveston, TX, using  
15 established procedures.

16 A standard protocol to isolate brain microvascular endothelial cells (BMECs) from wild-type  
17 mice (115) was used. Human umbilical vein endothelial cells (HUVECs) (Cell Applications, Inc.)  
18 or BMECs were cultivated in 5% CO<sub>2</sub> at 37°C on type I rat-tail collagen-coated round glass  
19 coverslips (12 mm diameter, Ted Pella, Redding, CA) until 90% confluence. HUVECs were  
20 infected with *R. parkeri* at an MOI of 10. Uninfected ECs were used as mock controls and were

1 subjected to the same procedure. All experiments were performed in triplicate. Normal mouse or  
2 rabbit IgGs were used as negative controls.

### 3 **ECExos and plsExos isolation, concentration, and permeabilization**

4 ECExos isolation and concentration: Donor HUVECs in T75 flasks were infected using 10  
5 MOI of *R. parkeri* or mock-infected for 72 hours, and 11 mL of media was collected. The media  
6 were passed through 0.2- $\mu$ m syringe filters twice. Following the instruction of the manufacturer,  
7 10 mL of filtered media was subjected to the qEV10 column (Izon, New Zealand) for SEC  
8 isolation. The number 7 to 10 fractions were collected as the Exo-enriched fractions, which were  
9 concentrated using 100,000 MWCO PES Vivaspin centrifugal filters (Thermo Fisher Scientific).  
10 Exo samples (in 200  $\mu$ l PBS) were stored at -80°C prior to use in downstream assays.

11 plsExos isolation and concentration: Blood samples were collected in anticoagulation tubes  
12 on day 4 p.i. for plasma isolation. The plasma sample (200  $\mu$ l) was passed through 0.2 $\mu$ m  
13 syringe filters twice. Following the instruction of the manufacturer, filtered plasma was subjected  
14 to the qEV10 (Izon, New Zealand) for SEC isolation. The number 7 to 10 fractions were  
15 collected as the Exo-enriched fractions, which were concentrated using 100,000 MWCO PES  
16 Vivaspin centrifugal filters (Thermo Fisher Scientific). Exo samples (in 200  $\mu$ l PBS) were stored  
17 at -80°C prior to use in downstream assays.

18 For saponin-assisted active exosomal permeabilization pretreatment (81-83) of Exos using  
19 RNase, Exo samples ( $1 \times 10^9$  particles/mL) and RNase (20  $\mu$ g/mL) (Thermo Fisher Scientific)  
20 were incubated with 0.1 mg/ml saponin (Thermo Fisher Scientific) at room temperature for 15

1 min. After rinsing using phosphate-buffered saline (PBS), Exo samples were concentrated using  
2 100,000 MWCO PES Vivaspin centrifugal filters.

### 3 **The distribution of Exos *in vivo* and *in vitro***

4 Using a published approach, recipient cell uptake of Exos was assessed *in vivo* and *in vitro*  
5 (90). Briefly, following incubation using materials from the PKH26 Red Fluorescent Cell Linker  
6 Kit (Millipore Sigma, St. Louis, MO), the Exos were washed three times with PBS before  
7 ultracentrifugation at 100,000  $\times g$  for 20 min at 4 °C using Beckman L7-80 and rotor SW41  
8 (Beckman Coulter, Indianapolis, IN) to remove unbound stain. PBS without Exo was processed  
9 with same steps as the mock PKH26-labeled tracer. A single injection of PKH26-labelled  
10 exosomes (about  $1 \times 10^{11}$  particles in 100  $\mu$ L of PBS) via the tail vein of a normal mouse  
11 was done to observe the distribution of Exos in the lungs, liver, and brain 6 hr after injection.  
12 Immunofluorescence staining was done using frozen sections with rabbit antibodies to CD31.  
13 For *in vitro* assessment, PKH26-labeled ECEXos (2000 particles/cell) were added in the culture  
14 media of normal human BMECs. After 2 hrs, cells were fixed. All solutions of PKH26-labeled  
15 ECEXos were filtered with a 0.2  $\mu$ m filter. Fluorescent images were analyzed using Olympus  
16 BX51 epifluorescence and Nikon A1R MP ECLIPSE Ti confocal microscope with NIS-Elements  
17 imaging software version 4.50.00 (Nikon, Tokyo, Japan).

### 18 **Stem-loop real time PCR**

19 Total RNA was extracted from EVs by using Trizol (Invitrogen). An exogenous synthetic  
20 microRNA, namely cel-mir-39, was diluted in TRIzol before extraction to act as a normalizer.  
21 The concentration of total RNA was measured by NanoDrop (ND-2000). TaqMan MicroRNA

1 Reverse Transcription kit (Applied Biosystems) was used for reverse transcription reactions. The  
2 15 ul RT reactions contained 5 ng total RNA template, 3 ul RT Primer (5×), 0.15 ul dNTPs (100  
3 mM), 1 ul MultiScribe reverse transcriptase (50 U/μL), 1.5 ul Reverse Transcription Buffer  
4 (10×), 0.19 ul RNase inhibitor (20 U/μL), and 4.16 ul nuclease-free water. Reverse transcription  
5 conditions were 16°C for 30 min, 42°C for 30 min, and 85°C for 5 min. For PCR amplification, the  
6 10 ul PCR reactions included 0.7 ul cDNA template acquired above, 0.5 ul TaqMan Small RNA  
7 Assay Mix (20X), 5 ul PCR Master Mix, and 3.8 ul nuclease-free water. qPCR reaction  
8 conditions were 50°C for 2 min, 95°C for 30 sec, followed by 40 cycles of 95°C for 5 sec, and 65°C  
9 for 30 sec. The relative expression of each miRNA was expressed as  $2^{-(\Delta\Delta CT)}$  by the CFX  
10 Connect Real-Time System (Bio-Rad, Hercules, CA).

## 11 **Statistics**

12 Statistical significance was determined using Student's *t*-test or one-way analysis of variance.  
13 Results were regarded as significant if two-tailed P values were < 0.05. All data are expressed as  
14 mean ± standard error of the mean.

## 15 **Acknowledgements**

16 We gratefully acknowledge Mr. Pragnesh Patel for his contributions establishing the capacity  
17 of the exosomal size distribution analysis. We gratefully acknowledge Dr. Kimberly Schuenke  
18 for her critical review and editing of the manuscript. We thank Dr. Hugo Samano for input  
19 during the planning phases of the experiments. This work was supported by NIH grant  
20 R01AI121012 (BG), R21AI137785 (BG), R21AI154211(BG), R03AI142406 (TS and BG), and

1 R21AI144328 (TS and BG). The sponsors had no role in the study design, data collection and  
2 analysis, decision to publish, or preparation of the manuscript.

3 **Authorship Contributions:** BG and TS designed the study, performed experiments,  
4 analyzed data, and wrote the manuscript. YL, CZ, ZS, QC, KK performed experiments, analyzed  
5 data, and the prepared manuscript. YQ, JB, AG, JX and AD analyzed data. YJ and GG designed  
6 the study and analyzed data.

7 **Disclosure of Conflicts of Interest:** The authors declare that they have no conflicts of  
8 interests.

## 9 **References**

- 10 1. Dumler JS, Walker DH. 2005. Rocky Mountain spotted fever--changing ecology and  
11 persisting virulence. *N Engl J Med* 353:551-3.
- 12 2. Parola P, Socolovschi C, Jeanjean L, Bitam I, Fournier PE, Sotto A, Labauge P, Raoult D.  
13 2008. Warmer weather linked to tick attack and emergence of severe rickettsioses. *PLoS*  
14 *Negl Trop Dis* 2:e338.
- 15 3. Chapman AS, Murphy SM, Demma LJ, Holman RC, Curns AT, McQuiston JH, Krebs  
16 JW, Swerdlow DL. 2006. Rocky mountain spotted fever in the United States, 1997-2002.  
17 *Ann N Y Acad Sci* 1078:154-5.
- 18 4. Walker DH, Paddock CD, Dumler JS. 2008. Emerging and re-emerging tick-transmitted  
19 rickettsial and ehrlichial infections. *Med Clin North Am* 92:1345-61, x.

- 1 5. Drexler NA, Dahlgren FS, Heitman KN, Massung RF, Paddock CD, Behravesh CB. 2016.  
2 National Surveillance of Spotted Fever Group Rickettsioses in the United States, 2008-  
3 2012. *Am J Trop Med Hyg* 94:26-34.
- 4 6. Saito TB, Bechelli J, Smalley C, Karim S, Walker DH. 2019. Vector Tick Transmission  
5 Model of Spotted Fever Rickettsiosis. *Am J Pathol* 189:115-123.
- 6 7. Lamason RL, Bastounis E, Kafai NM, Serrano R, Del Álamo JC, Theriot JA, Welch MD.  
7 2016. *Rickettsia Sca4* Reduces Vinculin-Mediated Intercellular Tension to Promote  
8 Spread. *Cell* 167:670-683.e10.
- 9 8. Whitman TJ, Richards AL, Paddock CD, Tamminga CL, Sniezek PJ, Jiang J, Byers DK,  
10 Sanders JW. 2007. *Rickettsia parkeri* infection after tick bite, Virginia. *Emerg Infect Dis*  
11 13:334-6.
- 12 9. Chan YG, Riley SP, Martinez JJ. 2010. Adherence to and invasion of host cells by  
13 spotted Fever group rickettsia species. *Front Microbiol* 1:139.
- 14 10. Feng HM, Wen J, Walker DH. 1993. *Rickettsia australis* infection: a murine model of a  
15 highly invasive vasculopathic rickettsiosis. *Am J Pathol* 142:1471-82.
- 16 11. Walker DH, Ismail N. 2008. Emerging and re-emerging rickettsioses: endothelial cell  
17 infection and early disease events. *Nat Rev Microbiol* 6:375-86.
- 18 12. Valbuena G, Walker DH. 2009. Infection of the endothelium by members of the order  
19 Rickettsiales. *Thromb Haemost* 102:1071-9.
- 20 13. Paris DH, Dumler JS. 2016. State of the art of diagnosis of rickettsial diseases: the use of  
21 blood specimens for diagnosis of scrub typhus, spotted fever group rickettsiosis, and  
22 murine typhus. *Curr Opin Infect Dis* 29:433-9.

- 1 14. Walker DH, Paddock CD, Dumler JS. 2008. Emerging and re-emerging tick-transmitted  
2 rickettsial and ehrlichial infections. *Med Clin North Am* 92:1345-1361.
- 3 15. Openshaw JJ, Swerdlow DL, Krebs JW, Holman RC, Mandel E, Harvey A, Haberling D,  
4 Massung RF, McQuiston JH. 2010. Rocky mountain spotted fever in the United States,  
5 2000-2007: interpreting contemporary increases in incidence. *Am J Trop Med Hyg*  
6 83:174-82.
- 7 16. Botelho-Nevers E, Socolovschi C, Raoult D, Parola P. 2012. Treatment of *Rickettsia* spp.  
8 infections: a review. *Expert Rev Anti Infect Ther* 10:1425-37.
- 9 17. de Sousa R, Nóbrega SD, Bacellar F, Torgal J. 2003. Mediterranean spotted fever in  
10 Portugal: risk factors for fatal outcome in 105 hospitalized patients. *Ann N Y Acad Sci*  
11 990:285-94.
- 12 18. Kim HK, Premaratna R, Missiakas DM, Schneewind O. 2019. O antigen is the target of  
13 bactericidal Weil-Felix antibodies. *Proc Natl Acad Sci U S A*  
14 doi:10.1073/pnas.1911922116.
- 15 19. Rennoll SA, Rennoll-Bankert KE, Guillotte ML, Lehman SS, Driscoll TP, Beier-Sexton  
16 M, Rahman MS, Gillespie JJ, Azad AF. 2018. The Cat Flea (*Ctenocephalides felis*)  
17 Immune Deficiency Signaling Pathway Regulates *Rickettsia typhi* Infection. *Infect*  
18 *Immun* 86.
- 19 20. Hillman RD, Baktash YM, Martinez JJ. 2013. OmpA-mediated rickettsial adherence to  
20 and invasion of human endothelial cells is dependent upon interaction with  $\alpha 2\beta 1$  integrin.  
21 *Cell Microbiol* 15:727-41.



- 1 21. Felsheim RF, Kurtti TJ, Munderloh UG. 2009. Genome sequence of the endosymbiont  
2 Rickettsia peacockii and comparison with virulent Rickettsia rickettsii: identification of  
3 virulence factors. PLoS One 4:e8361.
- 4 22. Suwanbongkot C, Langohr IM, Harris EK, Dittmar W, Christofferson RC, Macaluso KR.  
5 2019. Spotted Fever Group. Infect Immun 87.
- 6 23. Chung LK, Park YH, Zheng Y, Brodsky IE, Hearing P, Kastner DL, Chae JJ, Bliska JB.  
7 2016. The Yersinia Virulence Factor YopM Hijacks Host Kinases to Inhibit Type III  
8 Effector-Triggered Activation of the Pyrin Inflammasome. Cell Host Microbe 20:296-  
9 306.
- 10 24. Cao X, Kajino-Sakamoto R, Doss A, Aballay A. 2017. Distinct Roles of Sensory  
11 Neurons in Mediating Pathogen Avoidance and Neuropeptide-Dependent Immune  
12 Regulation. Cell Rep 21:1442-1451.
- 13 25. Behera AK, Hildebrand E, Uematsu S, Akira S, Coburn J, Hu LT. 2006. Identification of  
14 a TLR-independent pathway for Borrelia burgdorferi-induced expression of matrix  
15 metalloproteinases and inflammatory mediators through binding to integrin alpha 3 beta 1.  
16 J Immunol 177:657-64.
- 17 26. Allen LH, Criss AK. 2019. Cell intrinsic functions of neutrophils and their manipulation  
18 by pathogens. Curr Opin Immunol 60:124-129.
- 19 27. Darville T, Hiltke TJ. 2010. Pathogenesis of genital tract disease due to Chlamydia  
20 trachomatis. J Infect Dis 201 Suppl 2:S114-25.
- 21 28. Visvabharathy L, Freitag NE. 2017. Propofol Sedation Exacerbates Kidney Pathology  
22 and Dissemination of Bacteria during Staphylococcus aureus Bloodstream Infections.  
23 Infect Immun 85.

- 1 29. Paudel S, Baral P, Ghimire L, Bergeron S, Jin L, DeCorte JA, Le JT, Cai S, Jeyaseelan S.  
2 2019. CXCL1 regulates neutrophil homeostasis in pneumonia-derived sepsis caused by.  
3 Blood 133:1335-1345.
- 4 30. Maldonado-Arocho FJ, Green C, Fisher ML, Paczosa MK, Meccas J. 2013. Adhesins and  
5 host serum factors drive Yop translocation by yersinia into professional phagocytes  
6 during animal infection. PLoS Pathog 9:e1003415.
- 7 31. Portal-Celhay C, Tufariello JM, Srivastava S, Zahra A, Klevorn T, Grace PS, Mehra A,  
8 Park HS, Ernst JD, Jacobs WR, Philips JA. 2016. Mycobacterium tuberculosis EsxH  
9 inhibits ESCRT-dependent CD4. Nat Microbiol 2:16232.
- 10 32. Sia JK, Rengarajan J. 2019. Immunology of. Microbiol Spectr 7.
- 11 33. Schorey JS, Harding CV. 2016. Extracellular vesicles and infectious diseases: new  
12 complexity to an old story. J Clin Invest 126:1181-9.
- 13 34. Coelho C, Brown L, Maryam M, Vij R, Smith DFQ, Burnet MC, Kyle JE, Heyman HM,  
14 Ramirez J, Prados-Rosales R, Lauvau G, Nakayasu ES, Brady NR, Hamacher-Brady A,  
15 Coppens I, Casadevall A. 2019. virulence factors, including listeriolysin O, are secreted  
16 in biologically active extracellular vesicles. J Biol Chem 294:1202-1217.
- 17 35. Hui WW, Hercik K, Belsare S, Alugubelly N, Clapp B, Rinaldi C, Edelmann MJ. 2018.  
18 Salmonella enterica Serovar Typhimurium Alters the Extracellular Proteome of  
19 Macrophages and Leads to the Production of Proinflammatory Exosomes. Infect Immun  
20 86.
- 21 36. Nandakumar R, Tschismarov R, Meissner F, Prabakaran T, Krissanaprasit A, Farahani E,  
22 Zhang BC, Assil S, Martin A, Bertrams W, Holm CK, Ablasser A, Klause T, Thomsen  
23 MK, Schmeck B, Howard KA, Henry T, Gothelf KV, Decker T, Paludan SR. 2019.

- 1 Intracellular bacteria engage a STING-TBK1-MVB12b pathway to enable paracrine  
2 cGAS-STING signalling. *Nat Microbiol* 4:701-713.
- 3 37. Jones LB, Bell CR, Bibb KE, Gu L, Coats MT, Matthews QL. 2018. Pathogens and Their  
4 Effect on Exosome Biogenesis and Composition. *Biomedicines* 6.
- 5 38. Davis CN, Phillips H, Tomes JJ, Swain MT, Wilkinson TJ, Brophy PM, Morphew RM.  
6 2019. The importance of extracellular vesicle purification for downstream analysis: A  
7 comparison of differential centrifugation and size exclusion chromatography for helminth  
8 pathogens. *PLoS Negl Trop Dis* 13:e0007191.
- 9 39. Orchard RC, Kittisopikul M, Altschuler SJ, Wu LF, Süel GM, Alto NM. 2012.  
10 Identification of F-actin as the dynamic hub in a microbial-induced GTPase polarity  
11 circuit. *Cell* 148:803-15.
- 12 40. Taylor BD, Zheng X, Darville T, Zhong W, Konganti K, Abiodun-Ojo O, Ness RB,  
13 O'Connell CM, Haggerty CL. 2017. Whole-Exome Sequencing to Identify Novel  
14 Biological Pathways Associated With Infertility After Pelvic Inflammatory Disease. *Sex  
15 Transm Dis* 44:35-41.
- 16 41. Velarde JJ, Ashbaugh M, Wessels MR. 2014. The human antimicrobial peptide LL-37  
17 binds directly to CsrS, a sensor histidine kinase of group A *Streptococcus*, to activate  
18 expression of virulence factors. *J Biol Chem* 289:36315-24.
- 19 42. Elgharably H, Mann E, Awad H, Ganesh K, Ghatak PD, Gordillo G, Sai-Sudhakar CB,  
20 Roy S, Wozniak DJ, Sen CK. 2013. First evidence of sternal wound biofilm following  
21 cardiac surgery. *PLoS One* 8:e70360.
- 22 43. Bruckert WM, Price CT, Abu Kwaik Y. 2014. Rapid nutritional remodeling of the host  
23 cell upon attachment of *Legionella pneumophila*. *Infect Immun* 82:72-82.

- 1 44. Orihuela CJ, Mahdavi J, Thornton J, Mann B, Wooldridge KG, Abouseada N, Oldfield  
2 NJ, Self T, Ala'Aldeen DA, Tuomanen EI. 2009. Laminin receptor initiates bacterial  
3 contact with the blood brain barrier in experimental meningitis models. *J Clin Invest*  
4 119:1638-46.
- 5 45. Green ER, Juttukonda LJ, Skaar EP. 2019. The manganese-responsive transcriptional  
6 regulator MumR protects. *Infect Immun* doi:10.1128/IAI.00762-19.
- 7 46. Mooney B, Torres-Velez FJ, Doering J, Ehrbar DJ, Mantis NJ. 2019. Sensitivity of  
8 Kupffer cells and liver sinusoidal endothelial cells to ricin toxin and ricin toxin-Ab  
9 complexes. *J Leukoc Biol* 106:1161-1176.
- 10 47. Paumet F, Wesolowski J, Garcia-Diaz A, Delevoye C, Aulner N, Shuman HA, Subtil A,  
11 Rothman JE. 2009. Intracellular bacteria encode inhibitory SNARE-like proteins. *PLoS*  
12 *One* 4:e7375.
- 13 48. Liu X, Boyer MA, Holmgren AM, Shin S. 2020. Legionella-Infected Macrophages  
14 Engage the Alveolar Epithelium to Metabolically Reprogram Myeloid Cells and Promote  
15 Antibacterial Inflammation. *Cell Host Microbe* doi:10.1016/j.chom.2020.07.019.
- 16 49. Sixt BS, Bastidas RJ, Finethy R, Baxter RM, Carpenter VK, Kroemer G, Coers J,  
17 Valdivia RH. 2017. The Chlamydia trachomatis Inclusion Membrane Protein CpoS  
18 Counteracts STING-Mediated Cellular Surveillance and Suicide Programs. *Cell Host*  
19 *Microbe* 21:113-121.
- 20 50. Roxas JL, Vedantam G, Viswanathan VK. 2019. Epithelial maturity influences EPEC-  
21 induced desmosomal alterations. *Gut Microbes* 10:241-245.

- 1 51. Mishra M, Ressler A, Schlesinger LS, Wozniak DJ. 2015. Identification of OprF as a  
2 complement component C3 binding acceptor molecule on the surface of *Pseudomonas*  
3 *aeruginosa*. *Infect Immun* 83:3006-14.
- 4 52. Lee H, Li C, Zhang Y, Zhang D, Otterbein LE, Jin Y. 2019. Caveolin-1 selectively  
5 regulates microRNA sorting into microvesicles after noxious stimuli. *J Exp Med*  
6 doi:10.1084/jem.20182313.
- 7 53. Meldolesi J. 2018. Exosomes and Ectosomes in Intercellular Communication. *Curr Biol*  
8 28:R435-R444.
- 9 54. Mathieu M, Martin-Jaular L, Lavieu G, Théry C. 2019. Specificities of secretion and  
10 uptake of exosomes and other extracellular vesicles for cell-to-cell communication. *Nat*  
11 *Cell Biol* 21:9-17.
- 12 55. Temoche-Diaz MM, Shurtleff MJ, Nottingham RM, Yao J, Fadadu RP, Lambowitz AM,  
13 Schekman R. 2019. Distinct mechanisms of microRNA sorting into cancer cell-derived  
14 extracellular vesicle subtypes. *Elife* 8.
- 15 56. Shurtleff MJ, Temoche-Diaz MM, Karfilis KV, Ri S, Schekman R. 2016. Y-box protein  
16 1 is required to sort microRNAs into exosomes in cells and in a cell-free reaction. *Elife* 5.
- 17 57. Mukherjee K, Ghoshal B, Ghosh S, Chakrabarty Y, Shwetha S, Das S, Bhattacharyya SN.  
18 2016. Reversible HuR-microRNA binding controls extracellular export of miR-122 and  
19 augments stress response. *EMBO Rep* 17:1184-203.
- 20 58. Villarroya-Beltri C, Gutiérrez-Vázquez C, Sánchez-Cabo F, Pérez-Hernández D,  
21 Vázquez J, Martín-Cofreces N, Martínez-Herrera DJ, Pascual-Montano A, Mittelbrunn M,  
22 Sánchez-Madrid F. 2013. Sumoylated hnRNP A2B1 controls the sorting of miRNAs into  
23 exosomes through binding to specific motifs. *Nat Commun* 4:2980.

- 1 59. Santangelo L, Giurato G, Cicchini C, Montaldo C, Mancone C, Tarallo R, Battistelli C,  
2 Alonzi T, Weisz A, Tripodi M. 2016. The RNA-Binding Protein SYNCRIP Is a  
3 Component of the Hepatocyte Exosomal Machinery Controlling MicroRNA Sorting. *Cell*  
4 *Rep* 17:799-808.
- 5 60. Cha DJ, Franklin JL, Dou Y, Liu Q, Higginbotham JN, Demory Beckler M, Weaver AM,  
6 Vickers K, Prasad N, Levy S, Zhang B, Coffey RJ, Patton JG. 2015. KRAS-dependent  
7 sorting of miRNA to exosomes. *Elife* 4:e07197.
- 8 61. Chiou NT, Kageyama R, Ansel KM. 2018. Selective Export into Extracellular Vesicles  
9 and Function of tRNA Fragments during T Cell Activation. *Cell Rep* 25:3356-3370.e4.
- 10 62. Koppers-Lalic D, Hackenberg M, Bijnsdorp IV, van Eijndhoven MAJ, Sadek P, Sie D,  
11 Zini N, Middeldorp JM, Ylstra B, de Menezes RX, Würdinger T, Meijer GA, Pegtel DM.  
12 2014. Nontemplated nucleotide additions distinguish the small RNA composition in cells  
13 from exosomes. *Cell Rep* 8:1649-1658.
- 14 63. Alexander M, Hu R, Runtsch MC, Kagele DA, Mosbrugger TL, Tolmachova T, Seabra  
15 MC, Round JL, Ward DM, O'Connell RM. 2015. Exosome-delivered microRNAs  
16 modulate the inflammatory response to endotoxin. *Nat Commun* 6:7321.
- 17 64. Lobb RJ, Becker M, Wen SW, Wong CS, Wiegmanns AP, Leimgruber A, Möller A. 2015.  
18 Optimized exosome isolation protocol for cell culture supernatant and human plasma. *J*  
19 *Extracell Vesicles* 4:27031.
- 20 65. Stranska R, Gysbrechts L, Wouters J, Vermeersch P, Bloch K, Dierickx D, Andrei G,  
21 Snoeck R. 2018. Comparison of membrane affinity-based method with size-exclusion  
22 chromatography for isolation of exosome-like vesicles from human plasma. *J Transl Med*  
23 16:1.

- 1 66. Böing AN, van der Pol E, Grootemaat AE, Coumans FA, Sturk A, Nieuwland R. 2014.  
2 Single-step isolation of extracellular vesicles by size-exclusion chromatography. *J*  
3 *Extracell Vesicles* 3.
- 4 67. van Niel G, D'Angelo G, Raposo G. 2018. Shedding light on the cell biology of  
5 extracellular vesicles. *Nat Rev Mol Cell Biol* 19:213-228.
- 6 68. Soekmadji C, Hill AF, Wauben MH, Buzás EI, Di Vizio D, Gardiner C, Lötval J, Sahoo  
7 S, Witwer KW. 2018. Towards mechanisms and standardization in extracellular vesicle  
8 and extracellular RNA studies: results of a worldwide survey. *J Extracell Vesicles*  
9 7:1535745.
- 10 69. Silverman JM, Reiner NE. 2011. Exosomes and other microvesicles in infection biology:  
11 organelles with unanticipated phenotypes. *Cell Microbiol* 13:1-9.
- 12 70. Bhatnagar S, Shinagawa K, Castellino FJ, Schorey JS. 2007. Exosomes released from  
13 macrophages infected with intracellular pathogens stimulate a proinflammatory response  
14 in vitro and in vivo. *Blood* 110:3234-44.
- 15 71. Lee H, Groot M, Pinilla-Vera M, Fredenburgh LE, Jin Y. 2019. Identification of miRNA-  
16 rich vesicles in bronchoalveolar lavage fluid: Insights into the function and heterogeneity  
17 of extracellular vesicles. *J Control Release* 294:43-52.
- 18 72. Zhang D, Lee H, Zhu Z, Minhas JK, Jin Y. 2017. Enrichment of selective miRNAs in  
19 exosomes and delivery of exosomal miRNAs in vitro and in vivo. *Am J Physiol Lung*  
20 *Cell Mol Physiol* 312:L110-L121.
- 21 73. Hagiwara K, Katsuda T, Gailhouse L, Kosaka N, Ochiya T. 2015. Commitment of  
22 Annexin A2 in recruitment of microRNAs into extracellular vesicles. *FEBS Lett*  
23 589:4071-8.

- 1 74. Valadi H, Ekström K, Bossios A, Sjöstrand M, Lee JJ, Lötvall JO. 2007. Exosome-  
2 mediated transfer of mRNAs and microRNAs is a novel mechanism of genetic exchange  
3 between cells. *Nat Cell Biol* 9:654-9.
- 4 75. Duss O, Stepanyuk GA, Grot A, O'Leary SE, Puglisi JD, Williamson JR. 2018. Real-time  
5 assembly of ribonucleoprotein complexes on nascent RNA transcripts. *Nat Commun*  
6 9:5087.
- 7 76. Herster F, Bittner Z, Archer NK, Dickhöfer S, Eisel D, Eigenbrod T, Knorpp T,  
8 Schneiderhan-Marra N, Löffler MW, Kalbacher H, Vierbuchen T, Heine H, Miller LS,  
9 Hartl D, Freund L, Schäkel K, Heister M, Ghoreschi K, Weber ANR. 2020. Neutrophil  
10 extracellular trap-associated RNA and LL37 enable self-amplifying inflammation in  
11 psoriasis. *Nat Commun* 11:105.
- 12 77. Wei Z, Batagov AO, Schinelli S, Wang J, Wang Y, El Fatimy R, Rabinovsky R, Balaj L,  
13 Chen CC, Hochberg F, Carter B, Breakefield XO, Krichevsky AM. 2017. Coding and  
14 noncoding landscape of extracellular RNA released by human glioma stem cells. *Nat*  
15 *Commun* 8:1145.
- 16 78. Baglio SR, Rooijers K, Koppers-Lalic D, Verweij FJ, Pérez Lanzón M, Zini N, Naaijkens  
17 B, Perut F, Niessen HW, Baldini N, Pegtel DM. 2015. Human bone marrow- and  
18 adipose-mesenchymal stem cells secrete exosomes enriched in distinctive miRNA and  
19 tRNA species. *Stem Cell Res Ther* 6:127.
- 20 79. Patton JG, Franklin JL, Weaver AM, Vickers K, Zhang B, Coffey RJ, Ansel KM,  
21 Bbleloch R, Goga A, Huang B, L'Etoile N, Raffai RL, Lai CP, Krichevsky AM,  
22 Mateescu B, Greiner VJ, Hunter C, Voinnet O, McManus MT. 2015. Biogenesis,  
23 delivery, and function of extracellular RNA. *J Extracell Vesicles* 4:27494.



- 1 80. Gong B, Lee YS, Lee I, Shelite TR, Kunkeaw N, Xu G, Lee K, Jeon SH, Johnson BH,  
2 Chang Q, Ha T, Mendell NL, Cheng X, Bouyer DH, Boor PJ, Ksiazek TG, Walker DH.  
3 2013. Compartmentalized, functional role of angiogenin during spotted fever group  
4 rickettsia-induced endothelial barrier dysfunction: evidence of possible mediation by host  
5 tRNA-derived small noncoding RNAs. *BMC Infect Dis* 13:285.
- 6 81. Fuhrmann G, Serio A, Mazo M, Nair R, Stevens MM. 2015. Active loading into  
7 extracellular vesicles significantly improves the cellular uptake and photodynamic effect  
8 of porphyrins. *J Control Release* 205:35-44.
- 9 82. Ibsen SD, Wright J, Lewis JM, Kim S, Ko SY, Ong J, Manouchehri S, Vyas A, Akers J,  
10 Chen CC, Carter BS, Esener SC, Heller MJ. 2017. Rapid Isolation and Detection of  
11 Exosomes and Associated Biomarkers from Plasma. *ACS Nano* 11:6641-6651.
- 12 83. Kojima M, Gimenes-Junior JA, Chan TW, Eliceiri BP, Baird A, Costantini TW, Coimbra  
13 R. 2018. Exosomes in postshock mesenteric lymph are key mediators of acute lung injury  
14 triggering the macrophage activation. *FASEB J* 32:97-110.
- 15 84. Liu Y, Xiao J, Zhang B, Shelite TR, Su Z, Chang Q, Judy B, Li X, Drelich A, Bei J, Zhou  
16 Y, Zheng J, Jin Y, Rossi SL, Tang SJ, Wakamiya M, Saito T, Ksiazek T, Kaphalia B,  
17 Gong B. 2020. Increased talin-vinculin spatial proximities in livers in response to spotted  
18 fever group rickettsial and Ebola virus infections. *Lab Invest* doi:10.1038/s41374-020-  
19 0420-9.
- 20 85. Su Z, Chang Q, Drelich A, Shelite T, Judy B, Liu Y, Xiao J, Zhou C, He X, Jin Y, Saito  
21 T, Tang S, Soong L, Wakamiya M, Fang X, Bukreyev A, Ksiazek T, Russell W, Gong B.  
22 2020. Annexin A2 depletion exacerbates the intracerebral microhemorrhage induced by  
23 acute rickettsia and Ebola virus infections. *PLoS Neglected Tropical Diseases*:in press.

- 1 86. He X, Zhang W, Chang Q, Su Z, Gong D, Zhou Y, Xiao J, Drelich A, Liu Y, Popov V,  
2 Zhao X, Wakamiya M, Gaitas A, Lu F, Gong B. 2019. A new role for host annexin A2 in  
3 establishing bacterial adhesion to vascular endothelial cells: lines of evidence from  
4 atomic force microscopy and an in vivo study. *Lab Invest* doi:10.1038/s41374-019-0284-  
5 z.
- 6 87. Gong B, Shelite T, Mei FC, Ha T, Hu Y, Xu G, Chang Q, Wakamiya M, Ksiazek TG,  
7 Boor PJ, Bouyer DH, Popov VL, Chen J, Walker DH, Cheng X. 2013. Exchange protein  
8 directly activated by cAMP plays a critical role in bacterial invasion during fatal  
9 rickettsioses. *Proc Natl Acad Sci U S A* 110:19615-20.
- 10 88. Lee H, Zhang D, Laskin DL, Jin Y. 2018. Functional Evidence of Pulmonary  
11 Extracellular Vesicles in Infectious and Noninfectious Lung Inflammation. *J Immunol*  
12 201:1500-1509.
- 13 89. Sharma S, LeClaire M, Gimzewski JK. 2018. Ascent of atomic force microscopy as a  
14 nanoanalytical tool for exosomes and other extracellular vesicles. *Nanotechnology*  
15 29:132001.
- 16 90. Zhang D, Lee H, Wang X, Rai A, Groot M, Jin Y. 2018. Exosome-Mediated Small RNA  
17 Delivery: A Novel Therapeutic Approach for Inflammatory Lung Responses. *Mol Ther*  
18 26:2119-2130.
- 19 91. Gong B, Ma L, Liu Y, Gong Q, Shelite T, Bouyer D, Boor PJ, Lee YS, Oberhauser A.  
20 2012. Rickettsiae induce microvascular hyperpermeability via phosphorylation of VE-  
21 cadherins: evidence from atomic force microscopy and biochemical studies. *PLoS Negl*  
22 *Trop Dis* 6:e1699.

- 1 92. Noda K, Zhang J, Fukuhara S, Kunimoto S, Yoshimura M, Mochizuki N. 2010. Vascular  
2 endothelial-cadherin stabilizes at cell-cell junctions by anchoring to circumferential actin  
3 bundles through alpha- and beta-catenins in cyclic AMP-Epac-Rap1 signal-activated  
4 endothelial cells. *Mol Biol Cell* 21:584-96.
- 5 93. Zhang H, Liu J, Qu D, Wang L, Wong CM, Lau CW, Huang Y, Wang YF, Huang H, Xia  
6 Y, Xiang L, Cai Z, Liu P, Wei Y, Yao X, Ma RCW. 2018. Serum exosomes mediate  
7 delivery of arginase 1 as a novel mechanism for endothelial dysfunction in diabetes. *Proc*  
8 *Natl Acad Sci U S A* 115:E6927-E6936.
- 9 94. Yáñez-Mó M, Siljander PR, Andreu Z, Zavec AB, Borràs FE, Buzas EI, Buzas K, Casal  
10 E, Cappello F, Carvalho J, Colás E, Cordeiro-da Silva A, Fais S, Falcon-Perez JM,  
11 Ghobrial IM, Giebel B, Gimona M, Graner M, Gursel I, Gursel M, Heegaard NH,  
12 Hendrix A, Kierulf P, Kokubun K, Kosanovic M, Kralj-Iglic V, Krämer-Albers EM,  
13 Laitinen S, Lässer C, Lener T, Ligeti E, Linē A, Lipps G, Llorente A, Lötvall J, Manček-  
14 Keber M, Marcilla A, Mittelbrunn M, Nazarenko I, Nolte-'t Hoen EN, Nyman TA,  
15 O'Driscoll L, Olivan M, Oliveira C, Pállinger É, Del Portillo HA, Reventós J, Rigau M,  
16 Rohde E, Sammar M, et al. 2015. Biological properties of extracellular vesicles and their  
17 physiological functions. *J Extracell Vesicles* 4:27066.
- 18 95. Wilhelm I, Fazakas C, Krizbai IA. 2011. In vitro models of the blood-brain barrier. *Acta*  
19 *Neurobiol Exp (Wars)* 71:113-28.
- 20 96. Tang F, Hajkova P, Barton SC, Lao K, Surani MA. 2006. MicroRNA expression  
21 profiling of single whole embryonic stem cells. *Nucleic Acids Res* 34:e9.
- 22 97. Moltzahn F, Olshen AB, Baehner L, Peek A, Fong L, Stöppler H, Simko J, Hilton JF,  
23 Carroll P, Blelloch R. 2011. Microfluidic-based multiplex qRT-PCR identifies diagnostic

- 1 and prognostic microRNA signatures in the sera of prostate cancer patients. *Cancer Res*  
2 71:550-60.
- 3 98. Link F, Krohn K, Schumann J. 2019. Identification of stably expressed housekeeping  
4 miRNAs in endothelial cells and macrophages in an inflammatory setting. *Sci Rep*  
5 9:12786.
- 6 99. Hassani K, Olivier M. 2013. Immunomodulatory impact of leishmania-induced  
7 macrophage exosomes: a comparative proteomic and functional analysis. *PLoS Negl*  
8 *Trop Dis* 7:e2185.
- 9 100. Ghosh J, Bose M, Roy S, Bhattacharyya SN. 2013. *Leishmania donovani* targets Dicer1  
10 to downregulate miR-122, lower serum cholesterol, and facilitate murine liver infection.  
11 *Cell Host Microbe* 13:277-88.
- 12 101. Teysseire N, Boudier JA, Raoult D. 1995. *Rickettsia conorii* entry into Vero cells. *Infect*  
13 *Immun* 63:366-74.
- 14 102. Walker DH. 1988. Diagnosis of rickettsial diseases. *Pathol Annu* 23 Pt 2:69-96.
- 15 103. Chevillet JR, Kang Q, Ruf IK, Briggs HA, Vojtech LN, Hughes SM, Cheng HH, Arroyo  
16 JD, Meredith EK, Gallichotte EN, Pogossova-Agadjanyan EL, Morrissey C, Stirewalt DL,  
17 Hladik F, Yu EY, Higano CS, Tewari M. 2014. Quantitative and stoichiometric analysis  
18 of the microRNA content of exosomes. *Proc Natl Acad Sci U S A* 111:14888-93.
- 19 104. Manna I, Iaccino E, Dattilo V, Barone S, Vecchio E, Mimmi S, Filippelli E, Demonte G,  
20 Polidoro S, Granata A, Scannapieco S, Quinto I, Valentino P, Quattrone A. 2018.  
21 Exosome-associated miRNA profile as a prognostic tool for therapy response monitoring  
22 in multiple sclerosis patients. *FASEB J* 32:4241-4246.

- 1 105. Li J, Zhao Y, Lu Y, Ritchie W, Grau G, Vadas MA, Gamble JR. 2016. The Poly-cistronic  
2 miR-23-27-24 Complexes Target Endothelial Cell Junctions: Differential Functional and  
3 Molecular Effects of miR-23a and miR-23b. *Mol Ther Nucleic Acids* 5:e354.
- 4 106. Oikawa S, Wada S, Lee M, Maeda S, Akimoto T. 2018. Role of endothelial microRNA-  
5 23 clusters in angiogenesis in vivo. *Am J Physiol Heart Circ Physiol* 315:H838-H846.
- 6 107. Lee Y, Kim SJ, Choo J, Heo G, Yoo JW, Jung Y, Rhee SH, Im E. 2020. miR-23a-3p is a  
7 Key Regulator of IL-17C-Induced Tumor Angiogenesis in Colorectal Cancer. *Cells* 9.
- 8 108. Lopez-Ramirez MA, Reijerkerk A, de Vries HE, Romero IA. 2016. Regulation of brain  
9 endothelial barrier function by microRNAs in health and neuroinflammation. *FASEB J*  
10 30:2662-72.
- 11 109. Bridge G, Monteiro R, Henderson S, Emuss V, Lagos D, Georgopoulou D, Patient R,  
12 Boshoff C. 2012. The microRNA-30 family targets *DLL4* to modulate endothelial cell  
13 behavior during angiogenesis. *Blood* 120:5063-72.
- 14 110. Petrov AI, Kay SJE, Kalvari I, Howe KL, Gray KA, Bruford EA, Kersey PJ, Cochrane G,  
15 Finn RD, Bateman A, Kozomara A, Griffiths-Jones S, Frankish A, Zweib CW, Lau BY,  
16 Williams KP, Chan PP, Lowe TM, Cannone JJ, Gutell R, Machnicka MA, Bujnicki JM,  
17 Yoshihama M, Kenmochi N, Chai B, Cole JR, Szymanski M, Karlowski WM, Wood V,  
18 Huala E, Berardini TZ, Zhao Y, Chen R, Zhu W, Paraskevopoulou MD, Vlachos IS,  
19 Hatzigeorgiou AG, Ma L, Zhang Z, Puetz J, Stadler PF, McDonald D, Basu S, Fey P,  
20 Engel SR, Cherry JM, Volders PJ, Mestdagh P, Wower J, Clark MB, et al. 2017.  
21 RNAcentral: a comprehensive database of non-coding RNA sequences. *Nucleic Acids*  
22 *Res* 45:D128-D134.

- 1 111. Kozomara A, Birgaoanu M, Griffiths-Jones S. 2019. miRBase: from microRNA  
2 sequences to function. *Nucleic Acids Res* 47:D155-D162.
- 3 112. Cunningham F, Achuthan P, Akanni W, Allen J, Amode MR, Armean IM, Bennett R,  
4 Bhai J, Billis K, Boddu S, Cummins C, Davidson C, Dodiya KJ, Gall A, Girón CG, Gil L,  
5 Grego T, Haggerty L, Haskell E, Hourlier T, Izuogu OG, Janacek SH, Juettemann T, Kay  
6 M, Laird MR, Lavidas I, Liu Z, Loveland JE, Marugán JC, Maurel T, McMahon AC,  
7 Moore B, Morales J, Mudge JM, Nuhn M, Ogeh D, Parker A, Parton A, Patricio M,  
8 Abdul Salam AI, Schmitt BM, Schuilenburg H, Sheppard D, Sparrow H, Stapleton E,  
9 Szuba M, Taylor K, Threadgold G, Thormann A, Vullo A, et al. 2019. Ensembl 2019.  
10 *Nucleic Acids Res* 47:D745-D751.
- 11 113. Sader JE, Sanelli JA, Adamson BD, Monty JP, Wei X, Crawford SA, Friend JR, Marusic  
12 I, Mulvaney P, Bieske EJ. 2012. Spring constant calibration of atomic force microscope  
13 cantilevers of arbitrary shape. *Rev Sci Instrum* 83:103705.
- 14 114. Londoño AF, Mendell NL, Walker DH, Bouyer DH. 2019. A biosafety level-2 dose-  
15 dependent lethal mouse model of spotted fever rickettsiosis: *Rickettsia parkeri* Atlantic  
16 Rainforest strain. *PLoS Negl Trop Dis* 13:e0007054.
- 17 115. Drelich A, Judy B, He X, Chang Q, Yu S, Li X, Lu F, Wakamiya M, Popov V, Zhou J,  
18 Ksiazek T, Gong B. 2018. Exchange Protein Directly Activated by cAMP Modulates  
19 Ebola Virus Uptake into Vascular Endothelial Cells. *Viruses* 10.

20 **Figure legends**

21 **Figure 1: Characterization of plsExos and ECEExos after SEC isolation.** (a) plsExos and  
22 ECEExos morphologies were verified using atomic force microscopy (AFM)(left panels; scale

1 bars, 200 nm) and transmission electronic microscopy (TEM)(right panels; scale bars, 100 nm).  
2 **(b)** and **(c)**, the vesicle size distribution of isolated EVs was analyzed using nanoparticle tracking  
3 analysis (NTA) (n=5 per group). **d**, Expressions of indicated protein markers in 100 µg proteins  
4 of plsExos (upper panel) and ECEXos (lower panel) were examined using western  
5 immunoblotting.

6 **Figure 2: Exos are differentially induced and detected in mouse plasma and EC culture**  
7 **media in response to R infection.** **(a)** Expression of indicated protein markers (i.e., 30, 60, and  
8 90 µg of plsExos proteins) was examined using western immunoblotting. **(b)** and **(c)**, the  
9 concentration of plasExos and ECEXos was analyzed using NTA (n=5 per group). **(d)** and **(e)**,  
10 the concentration of exosomal total protein was determined using the microBCA protein assay  
11 (n=5 per group).

12 **Figure 3: Recipient cells take up Exos.** **(a)** Purified plsExos ( $5 \times 10^{10}$  particles in 50 µL PBS)  
13 labeled with PKH26 were administrated to wild-type mice intravenously (n=3). After 4 hrs,  
14 organs were dissected for frozen sectioning after euthanasia and perfusion via the right ventricle.  
15 Representative immunofluorescent staining of ECs from liver, brain, and lung using an antibody  
16 against CD31(an EC marker) is shown. The nuclei were stained with DAPI. Cells with red  
17 fluorescence indicate the uptake of PKH26 labeled Exos. Scale bars, 20 µm. **(b)** Purified ECEXos  
18 were labeled with PKH26 (red) and added to the culture medium of human BMECs (2000  
19 particles per cell) as indicated. Pictures were taken using fluorescence microscopy after 2 hrs of  
20 ECEXo incubation. Scale bars, 20 µm.

21 **Figure 4: Effect of R-plsExos or R-ECEXos on normal recipient ECs.** **(a)** The transendothelial  
22 electrical resistance (TEER) values of normal mouse recipient BMECs was measured after

1 treatment with normal plsExos (mock) or R-plsExos at 8, 40, or 160 pg Exos per cell for 72 hrs.  
2 \*,  $P < 0.05$ . (b) The TEER values of normal mouse recipient BMECs was measured after a 72  
3 hr-treatment with normal plsExos (mock) or R-plsExos, which were pretreated with 20  $\mu\text{g/mL}$   
4 ribonuclease (RNase) in the presence or absence of 0.1% saponin. \*\*,  $P < 0.01$ . (c)  
5 Immunofluorescence staining of tight junctional protein ZO-1 and adherens junctional protein  
6 VE-cadherin in normal human recipient BMECs that were treated with different Exos for 72 hrs.  
7 Scale bars, 20  $\mu\text{m}$ .

8 **Figure 5: Rickettsial infection alters microRNA expression in ECExos.** (a) Heatmap  
9 clustering of microRNAs in normal ECExos vs. R-ECExos (n=3). (b) microRNA expression in  
10 R-ECExos vs. normal ECExos (n=3). (c) Stem-loop RT-qPCR analysis of microRNAs obtained  
11 from normal ECExos (mock) and R-ECExos (rickettsial). \*\*,  $P < 0.01$ , \*  $P < 0.05$ . (d) Stem-loop  
12 RT-qPCR analysis of microRNAs obtained from normal (mock) and R-infected donor HUVECs.

13



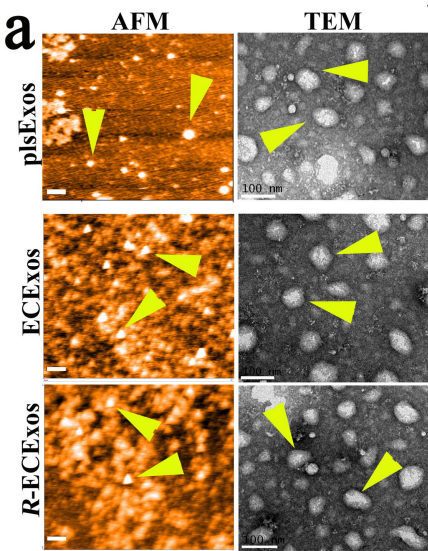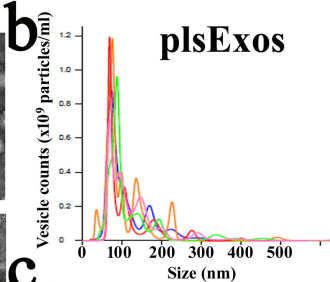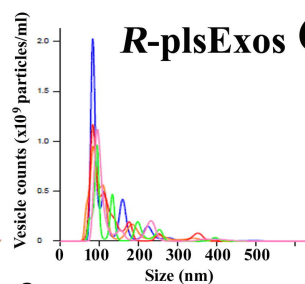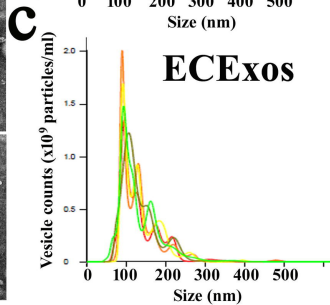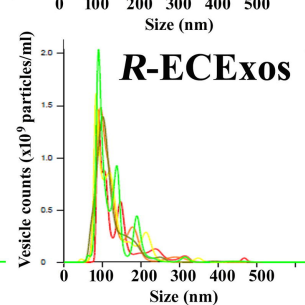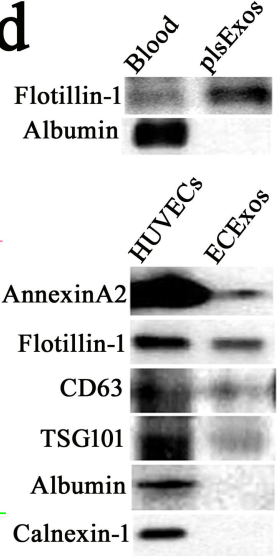

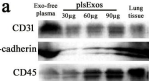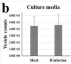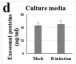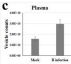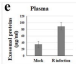

**a****Liver****Brain****Lung****Mock brain**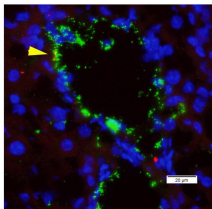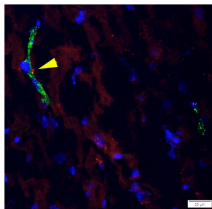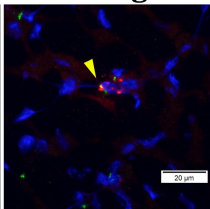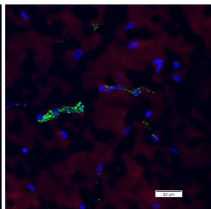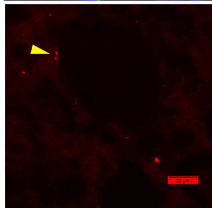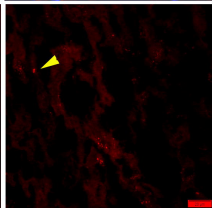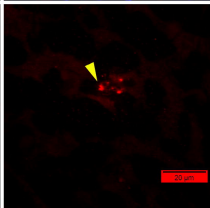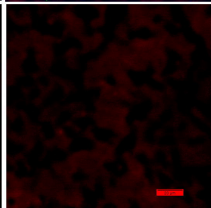**b****Labeled ECEExos****Labeled ECEExos****ECEExos****PBS**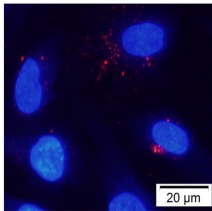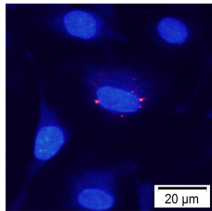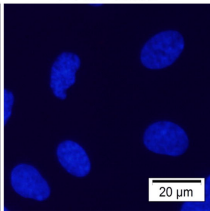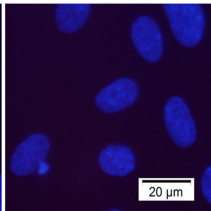

**a**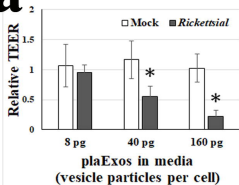**b**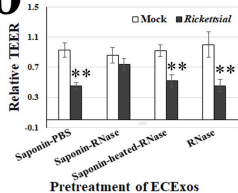**c**

PBS  
Saponin  
RNase  
ECEXos  
R-ECEXos

treatment  
of EXOS

+  
-  
-  
-  
-+  
-  
-  
+  
-+  
-  
-  
-  
+-  
+  
-  
-  
+-  
+  
+  
-  
+VE-cadherin  
ZO-1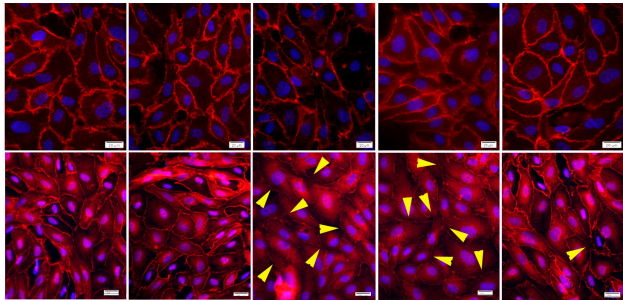

**a** **b**

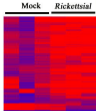

Log<sub>2</sub> normalized expression

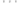

| microRNAs    | Fold increase | P value |
|--------------|---------------|---------|
| has-mir-23a  | 7.69294       | 0.00808 |
| has-mir-30b  | 3.03563       | 0.01829 |
| microRNAs    | Fold decrease | P value |
| has-mir-4488 | -5.45142      | 0.02590 |
| Has-mir-1468 | -2.62421      | 0.03271 |

**c**

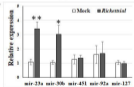

**d**

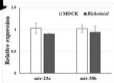

Source: https://www.biorxiv.org/content/10.1101/2020.11.16.385740v1.full.pdf
